# Supplementary material for: Stabilization of silicon nanoparticles in graphene aerogel framework for lithium ion storage
Source: Royal Society of Chemistry journal article supplement (doi:10.1039/c5ra00566c), 2015-01-01
Supplement: c5ra00566c1.pdf [file c5ra00566c1.pdf]

## Supporting Information

### Stabilization of Silicon Nanoparticles in Graphene Aerogel Framework for Lithium Ion Storage

Binghui Xu,<sup>a</sup> Hao Wu,<sup>a</sup> C. X. (Cynthia) Lin,<sup>a</sup> Bo Wang,<sup>a,b</sup> Zhi Zhang,<sup>c</sup> and X. S. Zhao<sup>a\*</sup>

<sup>a</sup> School of Chemical Engineering, The University of Queensland, St. Lucia, Brisbane, QLD 4072, Australia.

Email: [george.zhao@uq.edu.au](mailto:george.zhao@uq.edu.au)

<sup>b</sup> School of Chemical Engineering and Technology, Harbin Institute of Technology, Xidazhi Street, 150001 Harbin, China.

<sup>c</sup> Materials Engineering, The University of Queensland, St. Lucia, Brisbane, QLD 4072, Australia.

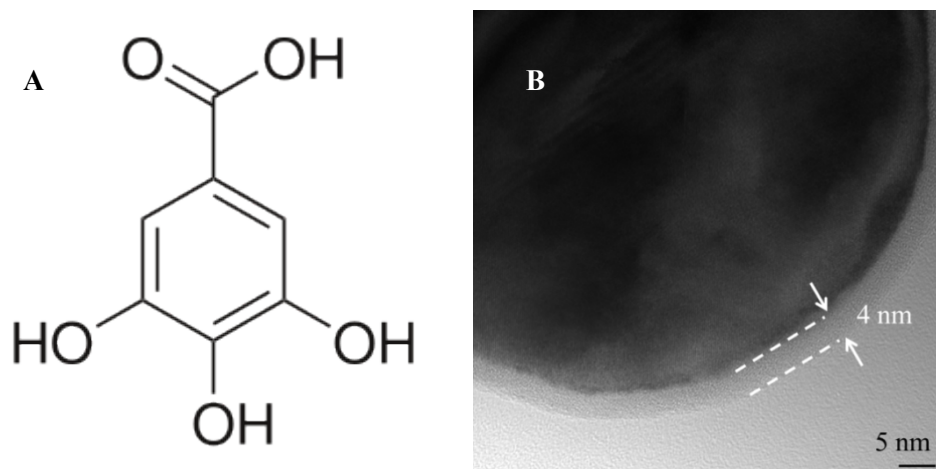

Figure S1. (A) Structure of GA; (B) HRTEM image of SiNPs used in this work.

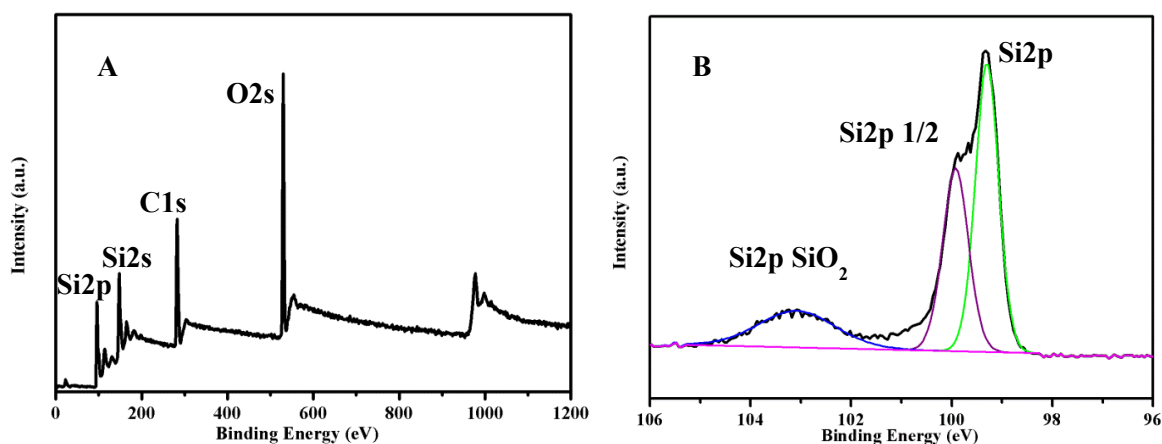

Figure S2. XPS survey (A) and Si 2p spectrum of SiNPs (B).

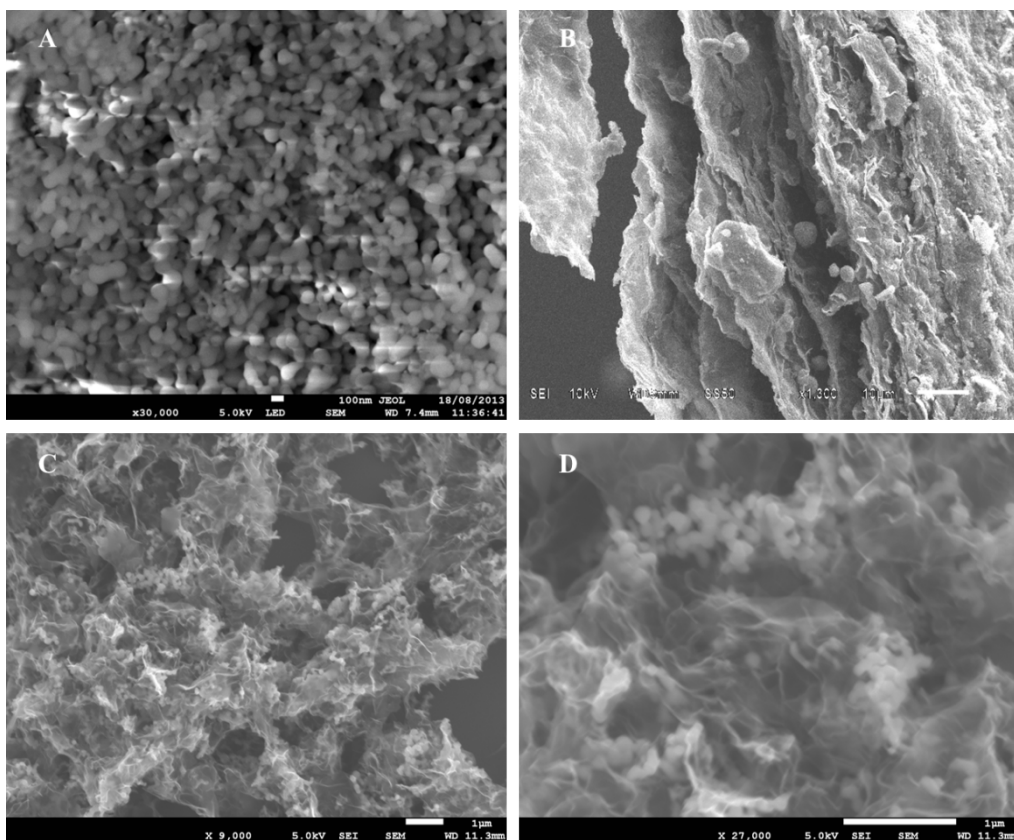

**Figure S3.** SEM images of SiNPs (A) sample Si/RGO (B), which was prepared by using physical mixing method and sample Si/RGO-SWAG (C, D), which was prepared by single RGO wrapping.

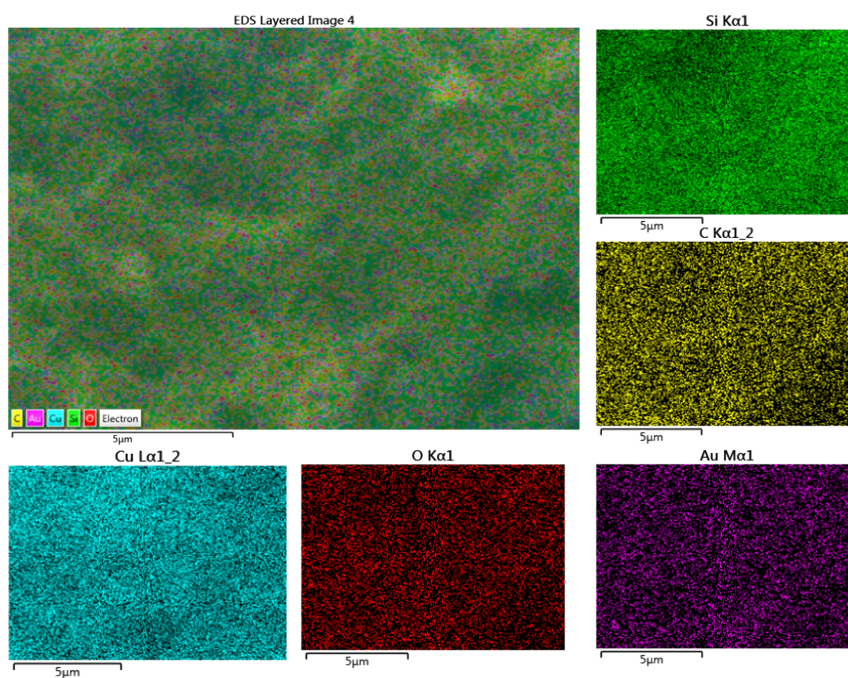

**Figure S4.** EDS mapping of Si/RGO-AG.

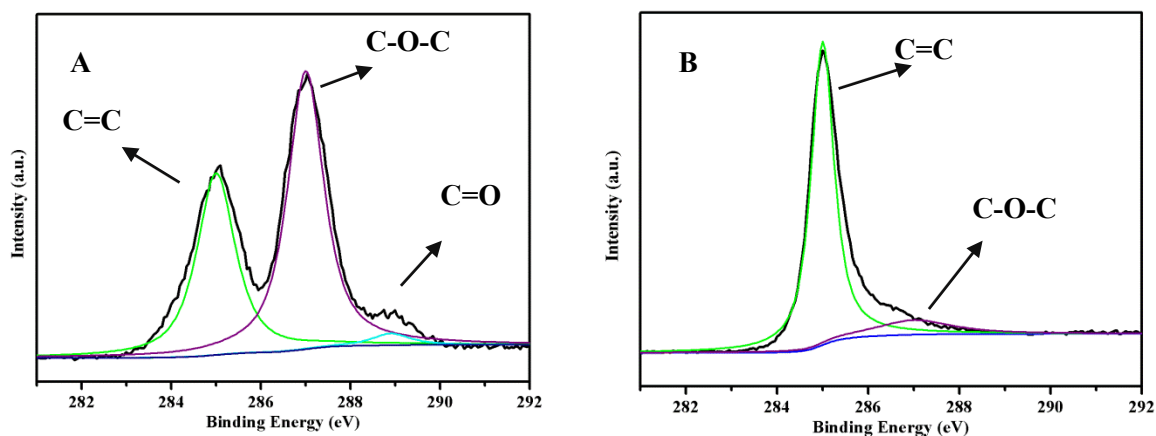

Figure S5. C 1s XPS spectra of GO (A) and Si/RGO-AG (B).

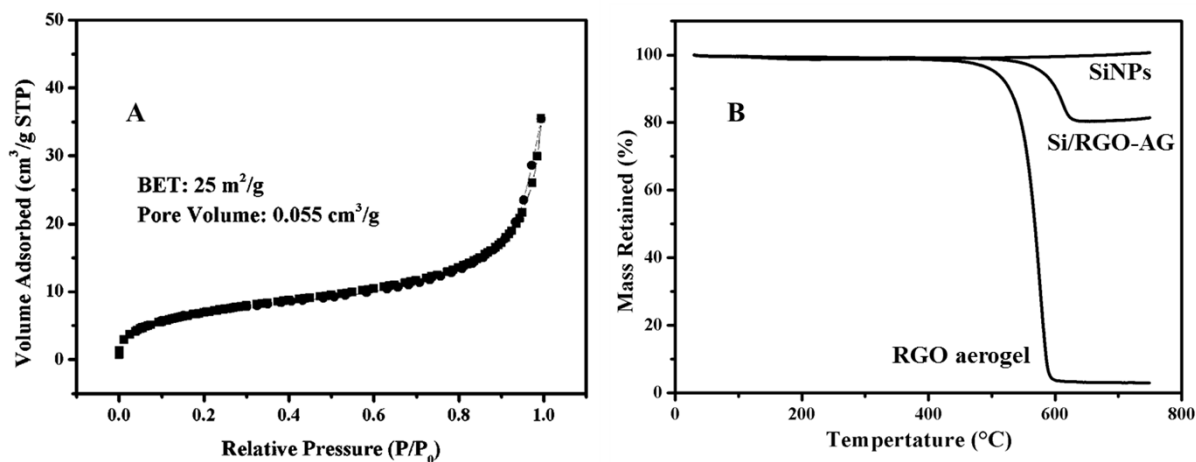

Figure S6. N<sub>2</sub> adsorption/desorption isotherm of SiNPs (A); TGA curves for SiNPs, RGO aerogel and Si/RGO-AG conducted in air (B).

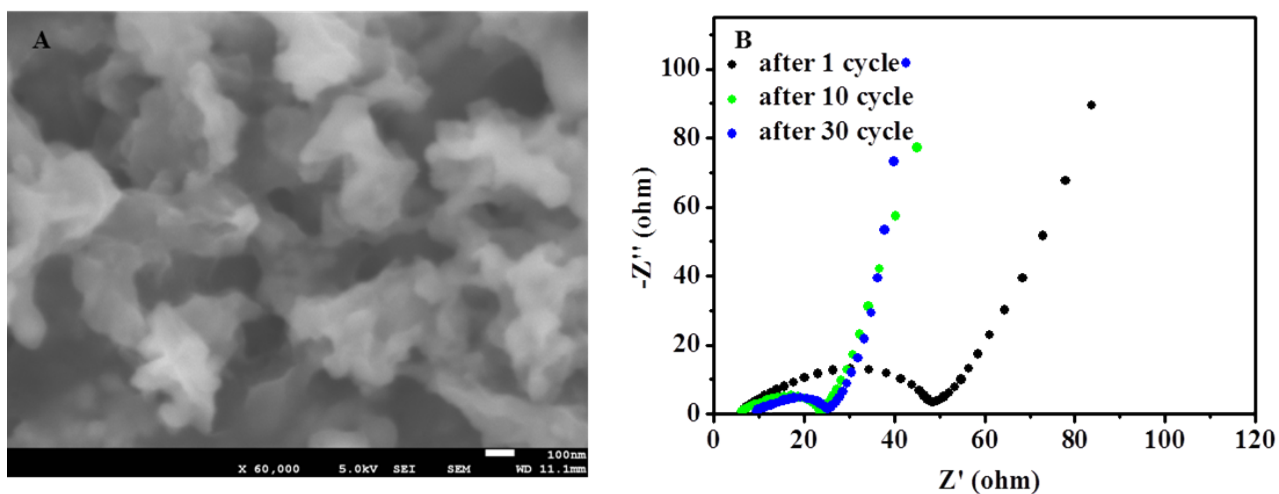

Figure S7. SEM image of Si/RGO-AG after 40 cycles (A); Electrochemical impedance spectroscopy (EIS) plots of Si/RGO-AG (B).
